# Supplementary material for: Obesity, Type 2 Diabetes, and the Risk of Carpal Tunnel Syndrome: A Two-Sample Mendelian Randomization Study
Source: Front Genet. 2021 Jul 22;12:688849. doi: 10.3389/fgene.2021.688849 (PMC8339995; doi:10.3389/fgene.2021.688849)
Supplement: Supplementary file 2 [file Table_2.XLSX]

## Sheet: Associations
Exposures	used SNPs	mean F-statistic	MR egger			weighted median			IVW			Pleiotropy (MR-Egger)		Heterogeneity		MR-presso			MR-presso outlier adjusted
			OR	95% CI	p	OR	95% CI	p	OR	95% CI	p	Intercept	p	Cochrane's Q	p	beta	sd	p	beta	sd	p
BMI	411	60.79	1.61279	1.0161804 2.559673	0.0431969	2.08161	1.5079236 2.873561	8.31361e-06	1.65649	1.3916562 1.971716	1.35934e-08	0.000429611	0.902557	443.446	0.122864	0.504699	0.0888801	2.57782e-08	NA	NA	NA
T2D	67	60.0433	1.00889	0.7487235 1.359463	0.953787	1.10944	0.9577407 1.285166	0.16623	1.17309	1.0657497 1.291241	0.00111174	0.0102249	0.299143	61.3507	0.639142	0.159641	0.0472046	0.00121386	1.11552	0.231545	1.08252e-05
Waist circumference	220	50.5335	0.888869	0.4051351 1.950186	0.769142	1.80403	1.2636906 2.575413	0.00115989	1.84855	1.4245649 2.398729	3.79842e-06	0.0115162	0.0543475	268.171	0.0115683	0.608985	0.132863	7.67927e-06	NA	NA	NA
Arm fat mass (right)	296	47.2978	1.94932	0.5859314 6.485128	0.27731	1.56808	1.1937124 2.059846	0.00122808	1.24683	0.8209428 1.893650	0.300837	-6.32892e-05	0.9891	330.288	0.076967	0.220602	0.213216	0.301673	0.403845	0.0949758	2.84018e-05
Arm fat-free mass (right)	456	53.3433	0.833715	0.4535876 1.532406	0.558439	1.16171	0.8299966 1.626000	0.382232	1.36203	1.0892248 1.703156	0.00673898	0.00615174	0.0900743	481.917	0.184783	0.374585	0.136676	0.0063713	0.309141	0.113974	0.00693265
HDL-cholesterol	58	118.513	1.08632	0.8013584 1.472615	0.595873	0.998178	0.7735689 1.288002	0.988811	1.0138	0.8580756 1.197780	0.872051	-0.00367728	0.595702	68.5927	0.139781	0.0136692	0.0843573	0.871838	NA	NA	NA
LDL-cholesterol	44	135.206	1.00572	0.7753578 1.304531	0.96591	1.11274	0.9161136 1.351576	0.281554	1.09597	0.9422249 1.274802	0.234712	0.00610272	0.429776	43.2719	0.459703	0.0771179	1.18831	0.241234	NA	NA	NA
total cholesterol	46	155.07	0.948691	0.7117095 1.264581	0.721166	1.09479	0.8938776 1.340862	0.381312	1.17077	0.9973089 1.374393	0.0539719	0.0142157	0.0938483	55.2135	0.141504	0.157659	0.0818129	0.0602999	NA	NA	NA
Triglycerides	33	228.151	0.934805	0.7387573 1.182880	0.578558	1.03904	0.8442176 1.278832	0.717703	1.11812	0.9601001 1.302146	0.150941	0.0143129	0.0594819	0.684772	0.684772	0.111648	0.0723088	0.13241	NA	NA	NA
Fasting insulin	7	57.9961	0.0429251	0.0001208038 15.252516	0.341513	1.24507	0.3253829195 4.764193	0.748863	1.80018	0.6213721312 5.215291	0.278701	0.0660249	0.260687	3.65019	0.723892	0.587885	0.423301	0.214248	NA	NA	NA
Fasting glucose	17	146.936	1.1354	0.4682389 2.753145	0.782559	1.41048	0.8116504 2.451136	0.222524	1.12638	0.7014417 1.808756	0.622367	-0.000309495	0.983396	21.7355	0.151941	0.119011	0.241647	0.629056	NA	NA	NA
HbA1C	16	62.3855	2.76555	0.8964497 8.531753	0.098524	2.49257	0.9671966 6.423614	0.0586318	2.04839	1.0117964 4.146966	0.0463065	-0.00703373	0.513884	12.7031	0.625217	0.717052	0.331164	0.046898	NA	NA	NA
